# Supplementary material
Source: Springer Nature journal article supplement (https://www.springermedizin.de/resource/supplementary/12990_2008_183_MOESM2_ESM.pdf/9612746)

GYKI52466 (50  $\mu$ g)

CNQX (6.1  $\mu$ g)

Mechanical test

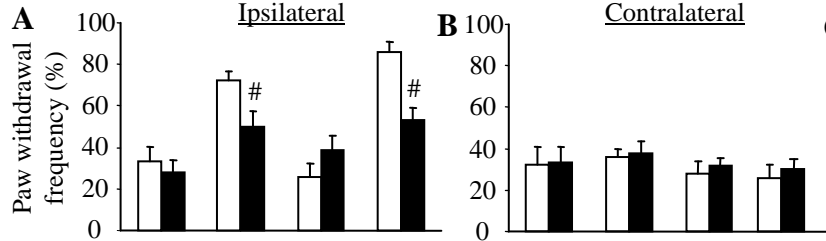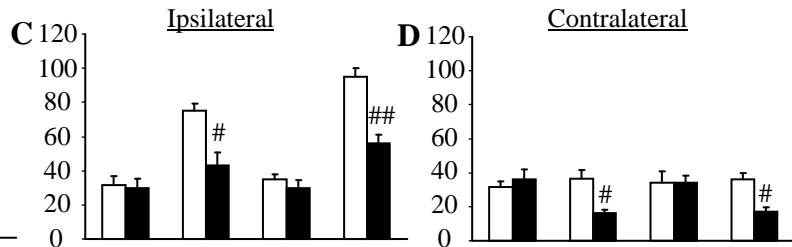

Thermal test

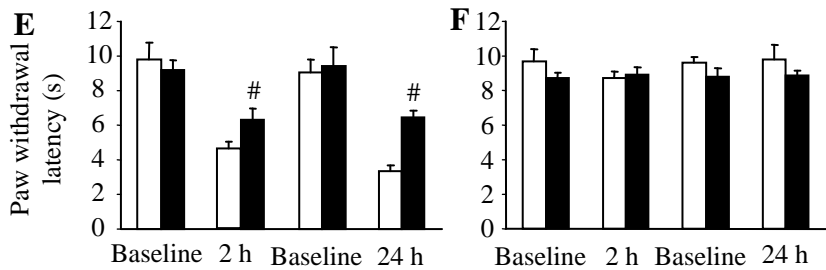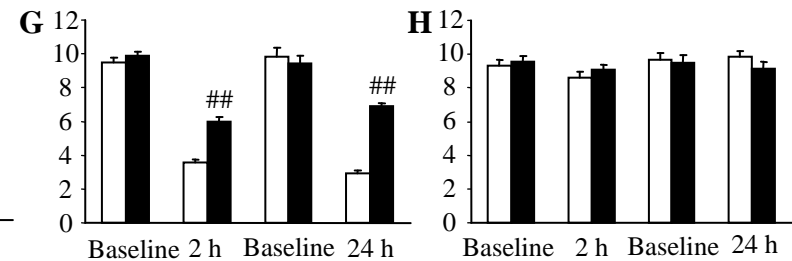

□ Vehicle

■ Drug

Supplement: MOESM2 [file 9612746]
